# Supplementary material
Source: MDPI journal article supplement (https://www.mdpi.com/2073-4395/14/3/626)
Supplement: s1 [file s1]

Article

**Cadmium exposure impairs development, detoxification mechanisms and gene expression of *Glyphodes pyloalis* Walker (Lepidoptera: Pyralidae)**

Shuaiqi Zhao <sup>1</sup>, Wanglong Miao <sup>1</sup>, Sheng Sheng <sup>1,2</sup>, Xin Pan <sup>1</sup>, Ping Li <sup>1,2</sup>, Weihong Zhou <sup>1,2\*</sup>, Fuan Wu <sup>1,2\*</sup>

1 Jiangsu Key Laboratory of Sericultural Biology and Biotechnology, School of Biotechnology, Jiangsu University of Science and Technology, Zhenjiang 212100, China.

2 Key Laboratory of Silkworm and Mulberry Genetic Improvement, Ministry of Agriculture and Rural Affairs, The Sericultural Research Institute, Chinese Academy of Agricultural Sciences, Zhenjiang 212100, China.

\*Corresponding author: zhouweihong2020@just.edu.cn (W.-H.Z.); fuword@163.com (F.-A.W.)



### Supplementary Material #1

*Glyphodes pyloalis* Walker was divided into 6 groups in the 2nd instar, and fed with mulberry leaves soaked in Cd concentrations at 0, 5, 15, 30, 60, 100 and 120mg/kg, respectively. The body weights of the *G. pyloalis* larvae (n=80) from 2nd to 5th instar of each group were recorded, and their corresponding Cd concentrations and larval weights were analyzed using probit regression analysis. Based on the regression analysis, IC<sub>10</sub> and IC<sub>50</sub> of Cd exposure on the larval weights was 3.89 mg/kg and 51.69 mg/kg, respectively.

| Heavy metal concentration (mg/kg) | Larval body weight gain<br>(mg) | Weight suppression rate (%) |
|-----------------------------------|---------------------------------|-----------------------------|
| 0                                 | 33.4±0.48a                      | 0a                          |
| 5                                 | 27.7±1.11b                      | 17.07b                      |
| 15                                | 26.2±2.44bc                     | 21.56bc                     |
| 30                                | 23.2±1.14c                      | 30.54c                      |
| 60                                | 15.8±1.051d                     | 52.69d                      |
| 100                               | 12.9±1.24de                     | 61.38de                     |
| 120                               | 8.8±0.7115e                     | 73.65e                      |

Different lowercase letters on the same column indicate significant differences between the Cd-treated groups ( $P<0.05$ ).

Table S1. Primers used for PCR in *G. pyloalis*

| Gene                | Forward Primer (5'-3') | Reverse Primer (5'-3') |
|---------------------|------------------------|------------------------|
| <i>CYP12A2</i>      | AAGACCAGGTTCGGCAAGAG   | GTCGTCAACCTGGCGTTAGA   |
| <i>CYP4G112</i>     | TGTACGATCCTCGCGATGTG   | TGAGGAGACCGTTTCCAAGC   |
| <i>CYP6AB51</i>     | CAGGAGTCAGGCCATGGAAG   | ATCCCTCAAAACCAGCTCCG   |
| <i>CYP4504V2</i>    | TCGTTTCAAAAGCTTGGCCG   | TGGCGCAAAGATAAGTCCGT   |
| <i>GST-epsilon4</i> | TTCAGGCCGAGTTCATCGAC   | TGTTCCCGTAAGTGTCTGCT   |
| <i>CarEs1</i>       | TATCGCACCCATCTCGTTCG   | AGTCGTTGACCAGCTTCCTG   |
| <i>AKP</i>          | AGATGGTACCAGACTCGGCT   | CGCCAACGATTTTAGCCTCG   |
| <i>ACP</i>          | TGTTTCGTCGATGGTGGGAAG  | GCCACTGAACCGACCACATA   |
| <i>Ugt2B1</i>       | ACCTGTCCTACCAACTTGCG   | CTCTGCTCCTGGTGGAAGT    |
| <i>UGT40AL1</i>     | GCTATAACCTGCCCCGAGGAC  | CCGGTCGTGGTAGATCGAAG   |
| <i>UGT2B30</i>      | TGACCTGATTGCTCGGGAAC   | AGGCTTGGCTTTAGGCACAT   |
| <i>Mn-SOD</i>       | CAAACACCACGCCACTTACG   | CTTTAACTTGTGCGTGCGCT   |
| <i>Rpl32</i>        | ACTGGCGTAAACCCAGAGGT   | GGTAGCATGTGACGGGTCTT   |

Table S2. Quality of *G. pyloalis* clean reads

| Sample | Raw      | Raw      | Clean    | Clean    | Q30   | GC (%) |
|--------|----------|----------|----------|----------|-------|--------|
|        | Reads(M) | Bases(G) | Reads(M) | Bases(G) | (%)   |        |
| CK_1   | 50.97    | 7.65     | 50.35    | 7.4      | 89.4  | 48.1   |
| CK_2   | 51.18    | 7.68     | 51.12    | 7.49     | 96.94 | 46.22  |
| CK_3   | 49.81    | 7.47     | 49.19    | 7.19     | 89.83 | 46.48  |
| LD_1   | 48.48    | 7.27     | 47.88    | 7.1      | 88.47 | 47.3   |
| LD_2   | 48.94    | 7.34     | 48.28    | 7.17     | 88.84 | 47.57  |
| LD_3   | 49.29    | 7.39     | 48.61    | 7.15     | 89.95 | 45.88  |
| HD_1   | 45.69    | 6.85     | 45.11    | 6.69     | 87.71 | 46.85  |
| HD_2   | 50.08    | 7.51     | 49.47    | 7.3      | 89.01 | 47.04  |
| HD_3   | 49.21    | 7.38     | 48.53    | 7.15     | 89.74 | 45.31  |

Table S3. Functional annotation of the *G. pyloalis* transcriptome

| Database                         | NR      | Swiss-Prot | KEGG    | Pfam    | eggNOG  | KOG     | GO      |
|----------------------------------|---------|------------|---------|---------|---------|---------|---------|
| Number of annotated unigenes     | 17,292  | 11,020     | 5,056   | 10,867  | 15,424  | 9,989   | 10,173  |
| Percentage of annotated unigenes | 57.68 % | 36.76 %    | 16.87 % | 36.25 % | 51.45 % | 33.32 % | 33.93 % |

Table S4. Summary of SSR searing in the *G. pyloalis* transcriptome.

| Searching Item                                 | Number     |
|------------------------------------------------|------------|
| Total number of sequences examined             | 29,978     |
| Total size of examined sequences (bp)          | 41,173,146 |
| Total number of identified SSRs                | 4,479      |
| Number of sequences containing more than 1 SSR | 3,631      |
| Number of SSRs present in compound formation   | 208        |

Table S5. List of DEGs related to detoxification and metabolism of *G. pyloalis* larvae

| Group     | Gene_id                    | Description         | Log <sub>2</sub> fold change | Up/Down |
|-----------|----------------------------|---------------------|------------------------------|---------|
| HD vs. CK | TRINITY_DN11850_c0_g1_i1_2 | <i>CYP12A2</i>      | 1.93                         | Up      |
| HD vs. CK | TRINITY_DN11966_c0_g1_i2_2 | <i>CYP4G112</i>     | 1.41                         | Up      |
| HD vs. CK | TRINITY_DN13233_c0_g1_i2_3 | <i>CYP6AB51</i>     | -4.06                        | Down    |
| HD vs. CK | TRINITY_DN12719_c6_g2_i1_3 | <i>CYP4504V2</i>    | -1.68                        | Down    |
| HD vs. CK | TRINITY_DN14393_c1_g1_i3_2 | <i>GST-epsilon4</i> | 1.55                         | Up      |
| HD vs. CK | TRINITY_DN13325_c0_g1_i2_2 | <i>CarEs1</i>       | 4.69                         | Up      |
| LD vs. CK | TRINITY_DN10895_c0_g1_i1_1 | <i>AKP</i>          | 1.17                         | Up      |
| LD vs. CK | TRINITY_DN13247_c0_g1_i5_1 | <i>ACP</i>          | 1.21                         | Up      |
| HD vs. CK | TRINITY_DN13922_c0_g3_i1_2 | <i>Ugt2B1</i>       | 2.86                         | Up      |
| HD vs. CK | TRINITY_DN10956_c0_g1_i1_3 | <i>UGT40AL1</i>     | -1.50                        | Down    |
| HD vs. CK | TRINITY_DN12887_c1_g1_i1_3 | <i>UGT2B30</i>      | -1.48                        | Down    |
| HD vs. CK | TRINITY_DN12845_c0_g2_i5_3 | <i>Mn-SOD</i>       | -1.31                        | Down    |



Table S6 Primers used to synthesize siRNA

| Primer Names      | Sequence (5'-3')                                |
|-------------------|-------------------------------------------------|
| GpCYP12A2-Oligo-1 | GATCACTAATACGACTCACTATAGGGCCAAGCCTCTCAAGAATATTT |
| GpCYP12A2-Oligo-2 | AAATATTCTTGAGAGGCTTGGCCCTATAGTGAGTCGTATTAGTGATC |
| GpCYP12A2-Oligo-3 | AACCAAGCCTCTCAAGAATATCCCTATAGTGAGTCGTATTAGTGATC |
| GpCYP12A2-Oligo-4 | GATCACTAATACGACTCACTATAGGGATATTCTTGAGAGGCTTGGTT |
| GFP-Oligo-1       | GATCACTAATACGACTCACTATAGGGGGGATGTCTCACATCTTGTTT |
| GFP-Oligo-2       | AAACAAGATGTGAGACATCCCCCTATAGTGAGTCGTATTAGTGATC  |
| GFP-Oligo-3       | AAGGGATGTCTCACATCTTGTCCTATAGTGAGTCGTATTAGTGATC  |
| GFP-Oligo-4       | GATCACTAATACGACTCACTATAGGGACAAGATGTGAGACATCCCTT |

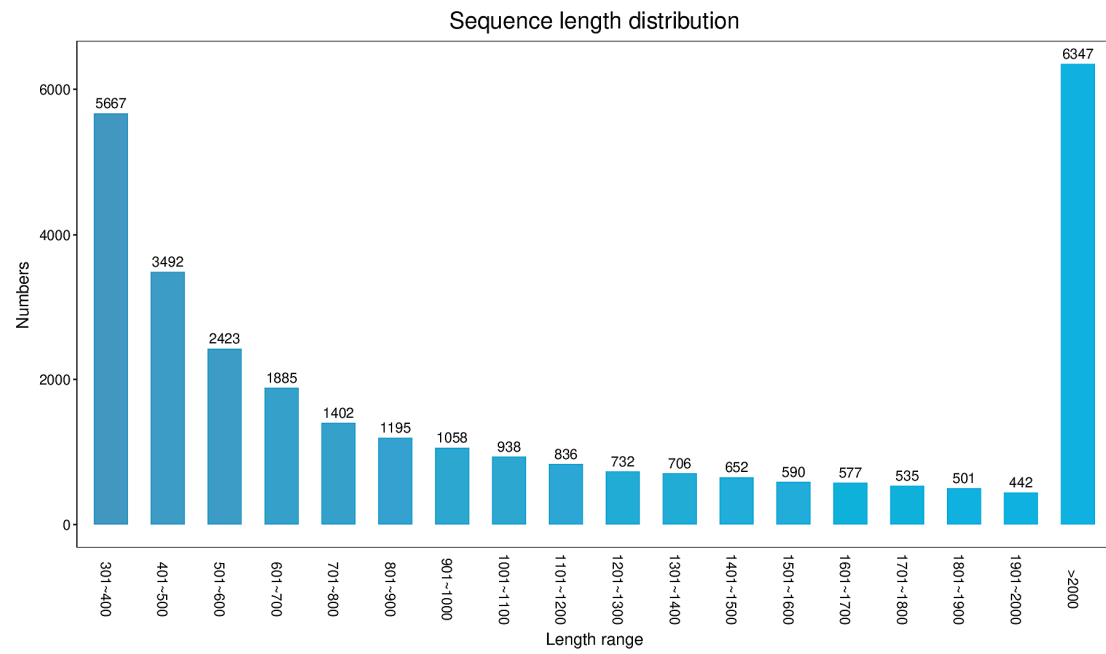

Figure S1. Length distribution of *G. pyloali*

Top 10 species distribution

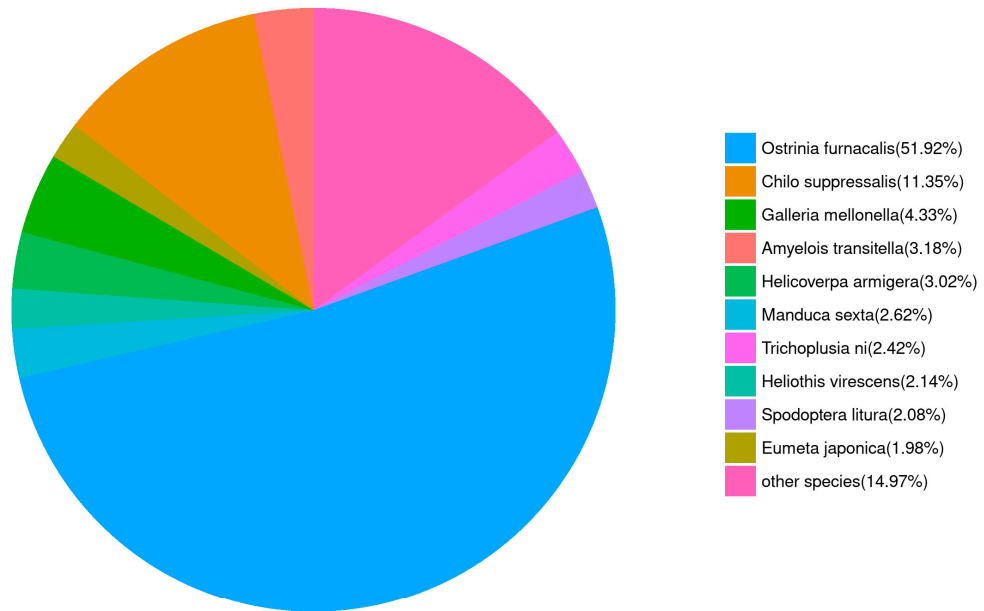

Figure S2. Species classification based on the NR database.

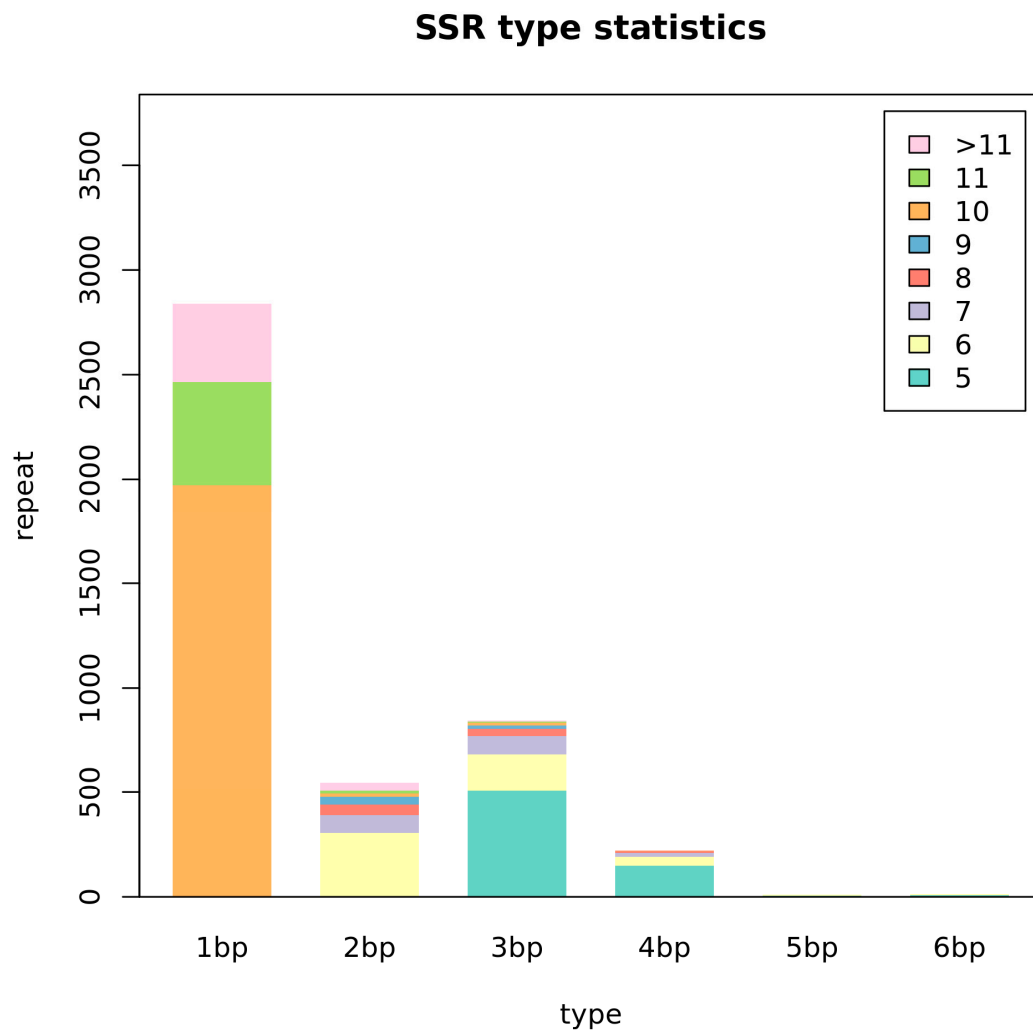

FigureS3. The repeat type frequency of SSR motifs in tested *G. pyloalis* transcriptome.

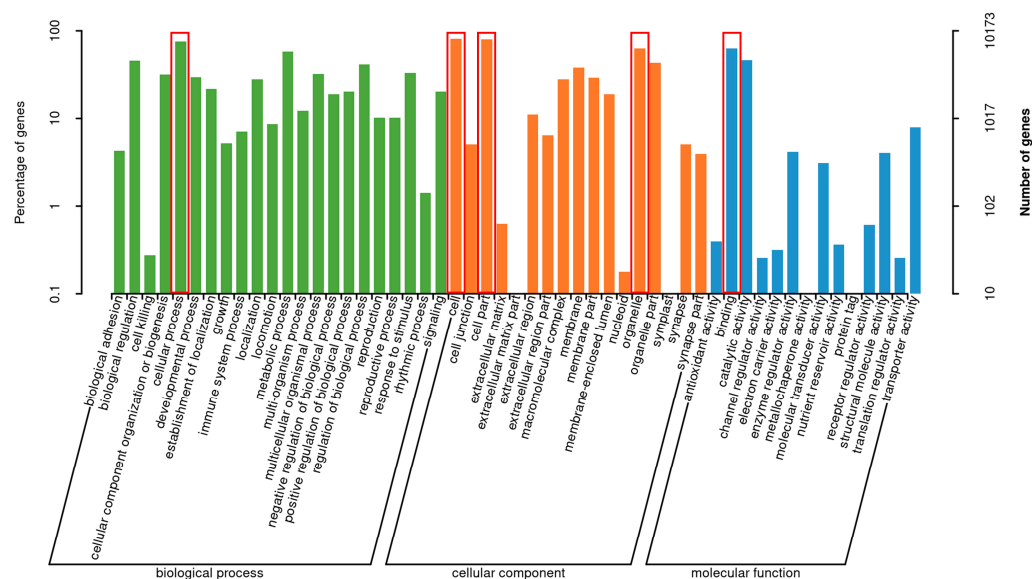

Figure S4. Classification of the gene ontology for the transcriptome of *G. pyloalis* 10,173 (33.93%) of the total unigenes were categorized into 53 function groups. The x-axis represents the different gene functions, and the y-axis denotes the number of DEGs. The red box represents top five abundant levels of GO terms.
